# Supplementary material for: Association of lung lesions measured by thoracic ultrasonography at first diagnosis of bronchopneumonia with relapse rate and growth performance in feedlot cattle
Source: PubMed Central journal article supplement — J Vet Intern Med. 2019 Mar 22;33(3):1540–6. doi: 10.1111/jvim.15483 (PMC6524390; doi:10.1111/jvim.15483), 2019-03-22
Supplement: JVIM-33-1540-s004.pdf [file JVIM-33-1540-s004.pdf]

**Table S1:** Descriptive statistics of health and performance of the feedlot cattle (n = 144) enrolled in the study.

| Feedlot # | Steers | Heifers | Days on feed at    |              | Average daily gain <sup>a</sup> |
|-----------|--------|---------|--------------------|--------------|---------------------------------|
|           |        |         | enrolment          | Relapse rate |                                 |
|           |        |         | (d; mean $\pm$ SD) |              | (kg; mean $\pm$ SD)             |
| 1         | 11     | 14      | 22 $\pm$ 7         | 32%          | .8 $\pm$ .3                     |
| 2         | 58     | 22      | 24 $\pm$ 13        | 13%          | .9 $\pm$ .3                     |
| 3         | 4      | 7       | 40 $\pm$ 8         | 45%          | 1.1 $\pm$ .5                    |
| 4         | 20     | 8       | 21 $\pm$ 6         | 7%           | 1.0 $\pm$ .4                    |

Abbreviation: SD, standard deviation.

<sup>a</sup>Average daily gain was calculated from d1 to d120 after arrival.
