# Supplementary material for: Association of lung lesions measured by thoracic ultrasonography at first diagnosis of bronchopneumonia with relapse rate and growth performance in feedlot cattle
Source: PubMed Central journal article supplement — J Vet Intern Med. 2019 Mar 22;33(3):1540–6. doi: 10.1111/jvim.15483 (PMC6524390; doi:10.1111/jvim.15483), 2019-03-22
Supplement: JVIM-33-1540-s005.pdf [file JVIM-33-1540-s005.pdf]

**Table S2:** Effects of maximal depth and maximal area of lung consolidation at first BP diagnosis on risk of BP relapse. Only cattle for which both thoracic sides were examined by TUS were included (n = 101).

| Independent variable and level      | Odds ratio* | 95% Confidence Interval | <i>P</i> -value |
|-------------------------------------|-------------|-------------------------|-----------------|
| Maximal depth (per cm)              | 1.38        | 1.05-1.81               | .02             |
| Maximal area (per cm <sup>2</sup> ) | 1.06        | 1.02-1.12               | .01             |

\* Results from two multivariable models (one for maximal depth and one for maximal area) including feedlot effect as a random effect.
