# Supplementary material for: Association of lung lesions measured by thoracic ultrasonography at first diagnosis of bronchopneumonia with relapse rate and growth performance in feedlot cattle
Source: PubMed Central journal article supplement — J Vet Intern Med. 2019 Mar 22;33(3):1540–6. doi: 10.1111/jvim.15483 (PMC6524390; doi:10.1111/jvim.15483), 2019-03-22
Supplement: JVIM-33-1540-s006.pdf [file JVIM-33-1540-s006.pdf]

**Table S3:** Effects of maximal depth and maximal area of lung consolidation at first BP diagnosis on average daily gain calculated from 1 to 120 days on feed. Only cattle for which both thoracic sides were examined by TUS were included (n = 101).

| Independent variable and level                   | Estimates <sup>a</sup> | 95% Confidence Interval | <i>P</i> -value |
|--------------------------------------------------|------------------------|-------------------------|-----------------|
| Maximal depth (per cm) <sup>b</sup>              | -0.020                 | -0.055 to 0.015         | .26             |
| Maximal area (per cm <sup>2</sup> ) <sup>c</sup> | -0.002                 | -0.009 to 0.005         | .56             |

<sup>a</sup> Results from two multivariable models (one for maximal depth and one for maximal area) including feedlot as a random effect.

<sup>b</sup> Intercept = 0.983 (0.762 - 1.205)

<sup>c</sup> Intercept = 0.942 (0.760 - 1.124)
