# Supplementary figures and images for: Association of lung lesions measured by thoracic ultrasonography at first diagnosis of bronchopneumonia with relapse rate and growth performance in feedlot cattle
Source: PubMed Central journal article supplement — J Vet Intern Med. 2019 Mar 22;33(3):1540–6. doi: 10.1111/jvim.15483 (PMC6524390; doi:10.1111/jvim.15483), 2019-03-22

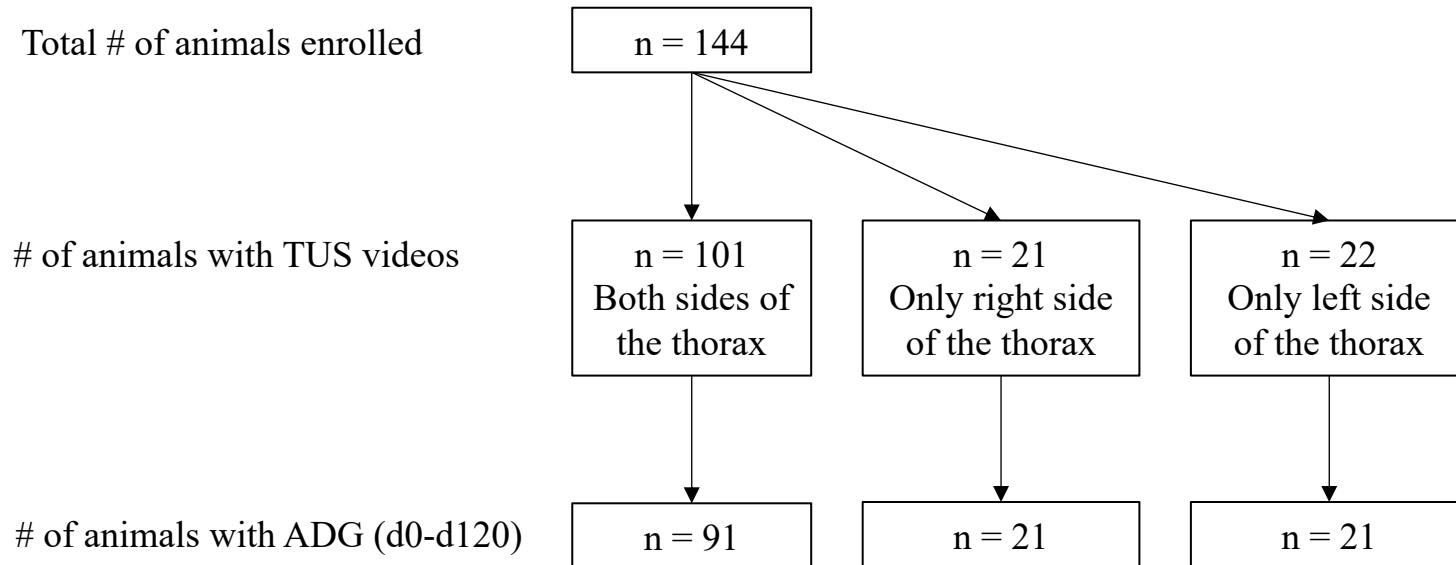

Supplement: JVIM-33-1540-s001.pdf [file JVIM-33-1540-s001.pdf]

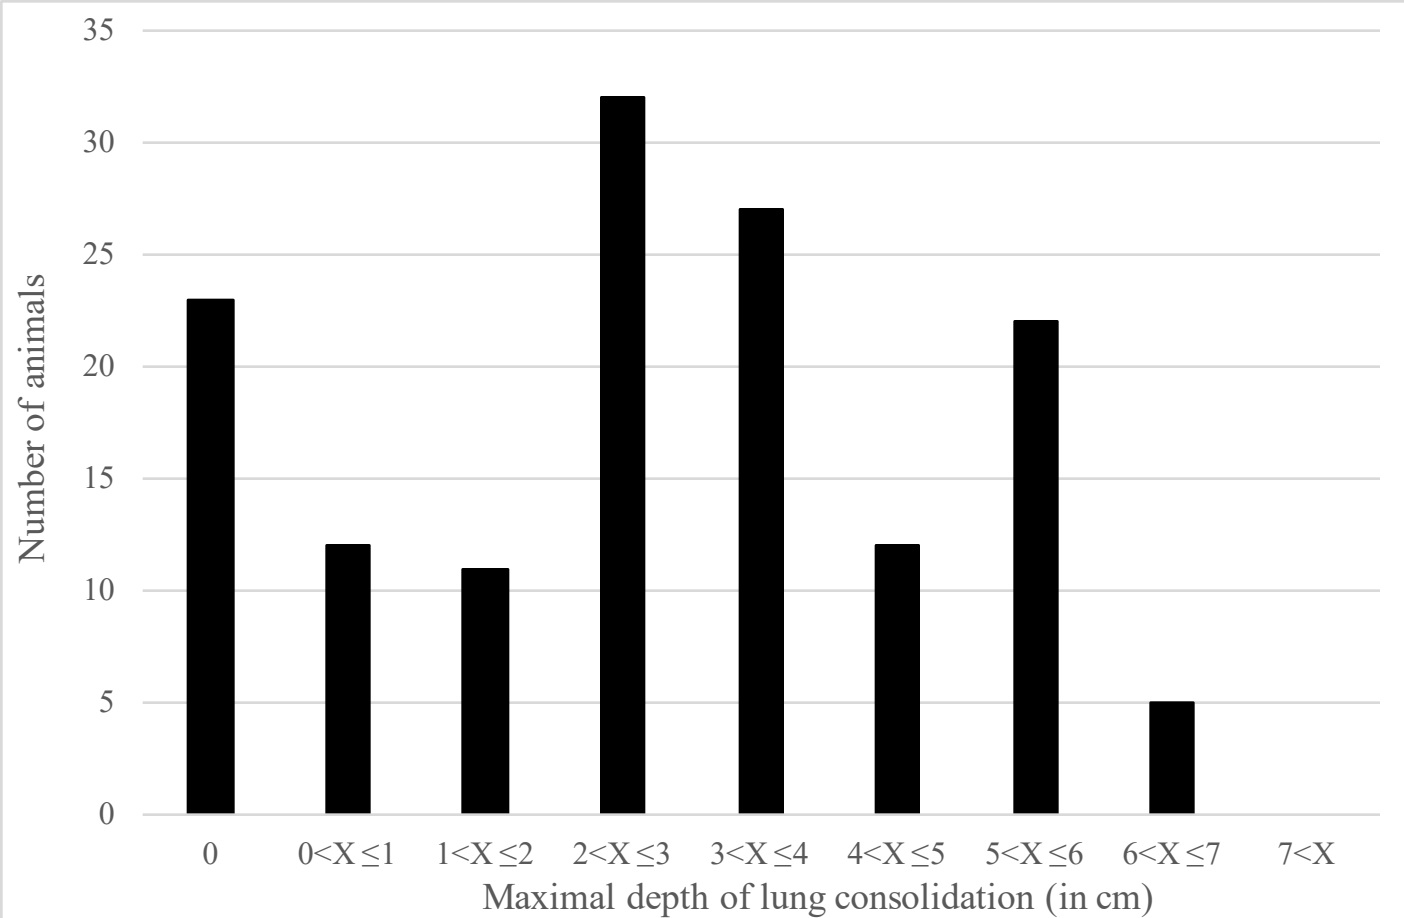

Supplement: JVIM-33-1540-s002.pdf [file JVIM-33-1540-s002.pdf]

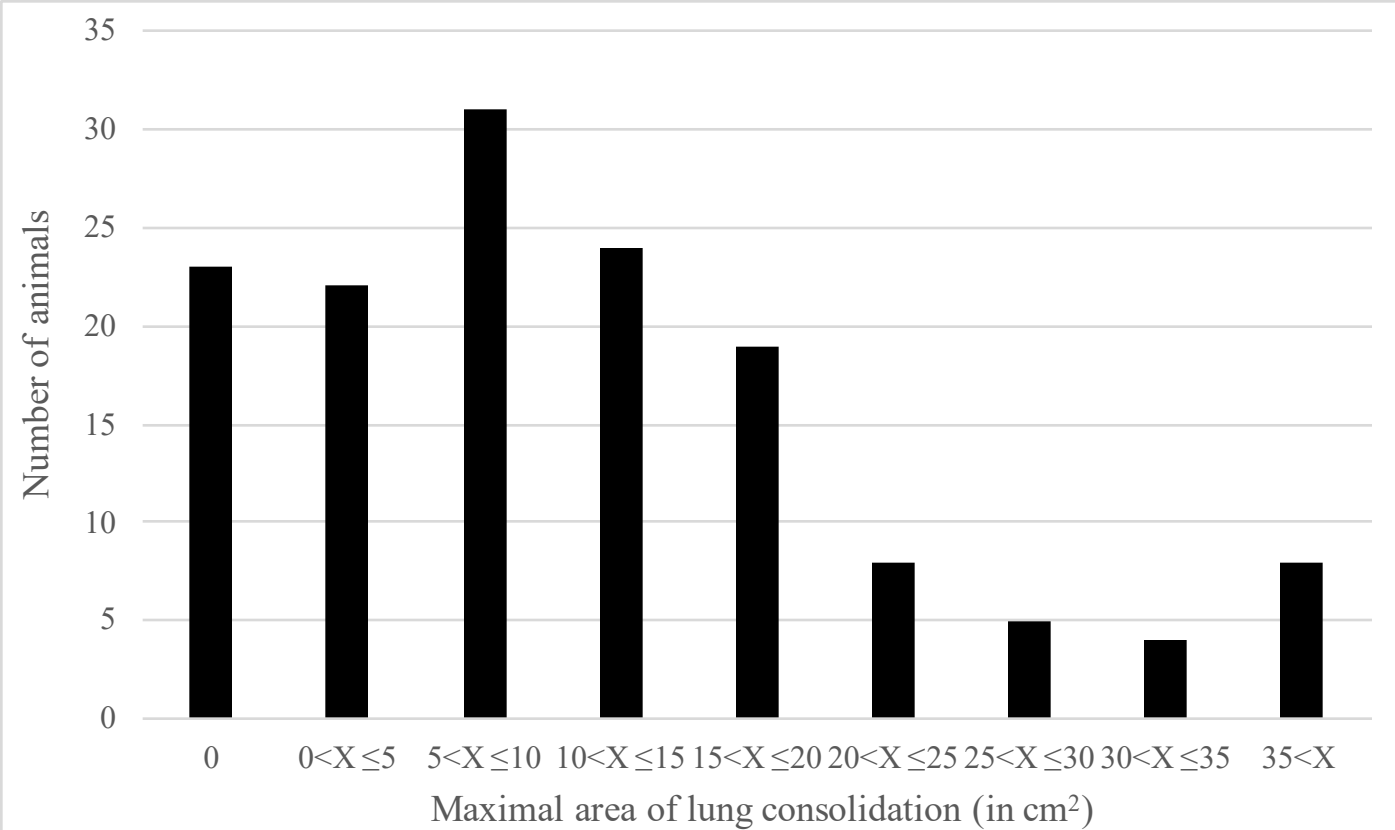

Supplement: JVIM-33-1540-s003.pdf [file JVIM-33-1540-s003.pdf]
